# Supplementary material for: Discovery-Based Protein Expression Profiling Identifies Distinct Subgroups and Pathways in Leiomyosarcomas
Source: Oxford University Press journal article supplement (doi:10.1158/1541-7786.mcr-14-0072), 2014-07-29
Supplement: 15417786mcr140072-sup-126294_2_supp_2536363_n7rqhl.docx [file 15417786mcr140072-sup-126294_2_supp_2536363_n7rqhl.docx]

Supplementary Figure Legends

Supplementary Figure 1. Hierachical clustering of the 2D gel images of the 101 soft tissue sarcomas. 1065 proteins were matched over 101 tumors run in duplicate with a constant pool reference. 981 spots were found to be statistically valid with the following criteria: Anova p=01, fold change >1.5, FDR 1% and were used for the clustering.

Supplementary Figure 2. Apoptosis and survival: Granzyme A signalling pathway (from MetaCore) with expression changes as thermometers.

Supplementary Figure 3. Cytoskeleton remodelling pathway (from MetaCore) with expression changes as thermometers.

Supplementary Figure 4. Telomere regulation and cellular immortalization (from MetaCore) with expression changes as thermometers.

Supplementary figure 5. Experimental design.

The scheme shows the experimental flow used in the experiments described in the manuscript.
